# Supplementary material for: Mechanism of metal doping in regulating the boron adsorption performance of Fe3O4 nanoparticles
Source: Royal Society of Chemistry journal article supplement (doi:10.1039/d5cc02174j), 2025-01-01
Supplement: d5cc02174j1.pdf [file d5cc02174j1.pdf]

# Mechanism of Metal Doping in Regulating Boron Adsorption Performance of Fe<sub>3</sub>O<sub>4</sub> Nanoparticles

Yumeng Jiang,<sup>ab</sup> Anni Yang,<sup>cd</sup> Huiqun Ju,<sup>ab</sup> Tianyu Li,<sup>ab</sup> Jiafei Lyu<sup>\*cd</sup> and Xianghai Guo<sup>\*abc</sup>

<sup>a</sup> *Tianjin Key Laboratory for Marine Environmental Research and Service, School of Marine Science and Technology, Tianjin University, Tianjin 300072, China*

<sup>b</sup> *Key Laboratory of Ocean Observation Technology of Ministry of Natural Resources, School of Marine Science and Technology, Tianjin University, Tianjin 300072, P. R. China*

<sup>c</sup> *Department of Pharmaceutical Engineering, School of Chemical Engineering and Technology, Tianjin University, Tianjin 300350, P. R. China*

<sup>d</sup> *Key Laboratory of Systems Bioengineering (Ministry of Education), Tianjin University, Tianjin, 300072, P. R. China*

\* Corresponding author

Xianghai Guo, Email: guoxh@tju.edu.cn

Jiafei Lyu, Email: jflv@tju.edu.cn

## Contents

### 1. Experiments

### 2. Figures

### 3. Tables

## References

## 1. Experiments

### 1.1 Raw Materials

All chemicals and solvents were purchased from commercial suppliers and used without further purification including ferric chloride hexahydrate ( $\text{FeCl}_3 \cdot 6\text{H}_2\text{O}$ , 99%, Aladdin, Shanghai, China), ferrous chloride tetrahydrate ( $\text{FeCl}_2 \cdot 4\text{H}_2\text{O}$ , 98%, Meryer, Shanghai, China), tetramethylammonium hydroxide ( $\text{N}^+(\text{CH}_3)_4\text{OH}^-$ , 25%w/w in water, Meryer, Shanghai, China), calcium chloride dihydrate ( $\text{CaCl}_2 \cdot 2\text{H}_2\text{O}$ , Meryer, Shanghai, China), magnesium chloride ( $\text{MgCl}_2$ , Meryer, Shanghai, China), zinc chloride ( $\text{ZnCl}_2$ , Meryer, Shanghai, China), chromic chloride ( $\text{CrCl}_2$ , Aladdin, Shanghai, China), copper chloride dihydrate ( $\text{CuCl}_2 \cdot 2\text{H}_2\text{O}$ , Meryer, Shanghai, China), cobalt chloride ( $\text{CoCl}_2$ , 99.7%, Macklin, Shanghai, China), manganese chloride ( $\text{MnCl}_2$ , Meryer, Shanghai, China), hydrochloric acid (36~38%, Yuanli, Tianjin, China), Mannitol ( $\text{C}_6\text{H}_{14}\text{O}_6$ , Aladdin, Shanghai, China), sodium hydroxide standard solution ( $\text{NaOH}$ , Aladdin, Shanghai, China), Deionized water was used as water source throughout the experiments.

### 1.2 Preparation of $\text{Fe}_3\text{O}_4$ magnetic nanoparticles

For magnetite nanoparticles synthesis, 1 M ferric chloride hexahydrate and 2 M ferrous chloride tetrahydrate were prepared by dissolving iron salts in 2 M HCl solutions, respectively. In a typical experimental procedure, 10 ml of 1 M  $\text{FeCl}_3$  solution was mixed with 2.5 mL of 2 M  $\text{FeCl}_2$  solution in a flask. Metal doped samples were synthesized via 10 ml of 1 M  $\text{FeCl}_3$  2.275 mL of 2 M  $\text{FeCl}_2$  and 0.225 mL of 2 M  $\text{MCl}_2$  ( $\text{M}=\text{Ca}, \text{Mg}, \text{Zn}, \text{Cu}, \text{Co}, \text{Cr}, \text{Mn}$ ). This solution was stirred, followed by the slow addition of 21 mL 25% (w/w)  $\text{N}^+(\text{CH}_3)_4\text{OH}^-$ . The mixture was stirred for 25 minutes at a speed of 600 rpm using a magnetic heating stirrer. The doped samples were obtained by cationic substitution at 3% molar proportions in relation to Fe ions.

### 1.3 Characterization

X-ray diffraction (XRD) patterns of experimental sample were detected by Rigaku X-ray diffractometer (Smartlab SE) equipped with a rotating anode of 1.6 KW  $\text{Cu-K}\alpha_1$

X-ray radiation ( $\lambda = 0.15406$  nm). Measurements were made over the range of  $10^\circ < 2\theta < 70^\circ$  in a  $0.05^\circ$  step width with a  $2^\circ/\text{min}$  scanning speed. Scanning electron microscopy (SEM) images were obtained from ZEISS Sigma 360 operated at 3kV. Transmission electron microscope (TEM) images were obtained from JEOL JEM-2100F operated at 200kV. The magnetic characterization at room temperature was obtained using a vibrating sample magnetometer (VSM) Lakeshore 7404. X-ray photoelectron spectroscopy (XPS) was recorded by Thermo Scientific K-Alpha.

#### 1.4 B analysis method

The boric acid concentration ( $Q_e$ ) was obtained by acid-base titration. 1mL 0.5 M mannitol solution and two drops of 5% phenolphthalein indicator solution were added into a 50 mL conical bottle, and the mass  $M_1$  was obtained (Sartorius BSA224S-CW). Then 0.2 mL of the post-adsorption solution was added and the mass  $M_2$  was weighed. It was titrated with sodium hydroxide standard solution (0.05 mol /L) until pink, and the mass  $M_3$  was obtained.

$$Q_e = \frac{M_3 - M_2}{M_2 - M_1} \times 0.05$$

#### 1.5 Adsorption experiments

Before the adsorption studies,  $\text{Fe}_3\text{O}_4$  magnetic nanoparticles was activated in a vacuum oven at  $60^\circ\text{C}$  for 10 h. In a typical adsorption experiment, 0.05 g  $\text{Fe}_3\text{O}_4$  or  $\text{M}@\text{Fe}_3\text{O}_4$  ( $\text{M} = \text{Ca}^{2+}, \text{Mg}^{2+}, \text{Zn}^{2+}, \text{Cu}^{2+}, \text{Co}^{2+}, \text{Mn}^{2+}, \text{Cr}^{2+}$ ) was added into a 50 mL centrifuge tube, followed by 10 mL boron aqueous solution with specific pH and concentration. The tube was placed in a thermostatic shaker at  $45^\circ\text{C}$  for boron removal<sup>1</sup>. When the adsorption was completed,  $\text{Fe}_3\text{O}_4$  or  $\text{M}@\text{Fe}_3\text{O}_4$  was separated by magnetic field and the residual solution was examined for boron concentration.

#### 1.6 Effect of pH on boron separation

The adsorption experiment was carried out with a series of boron solutions at pH=3-11. The pH was adjusted by 2 mol/L aqueous hydrochloric acid solution or 2 mol/L aqueous sodium hydroxide solution. The activated  $\text{Mg}@\text{Fe}_3\text{O}_4$  was added to these prepared solutions with the dose of  $5 \text{ g}\cdot\text{L}^{-1}$ . The mixtures were placed in a

constant temperature shaker at 45 °C for 24 h. The adsorbent was separated by a magnet and the residual solutions were tested for boron concentration.

## 2. Figures

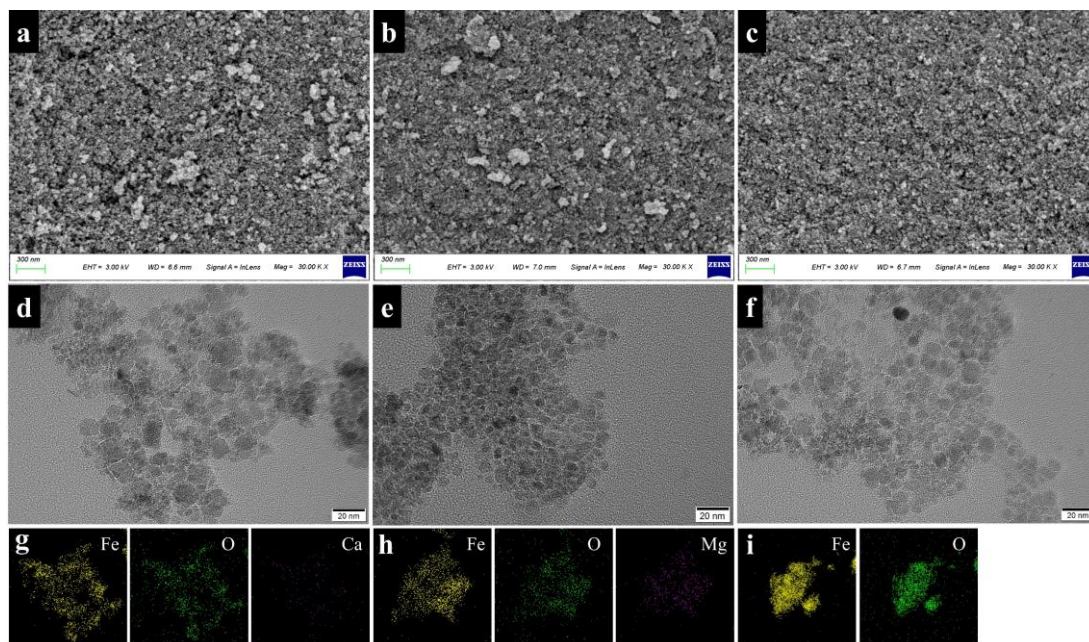

**Fig. S1** SEM images of a)  $\text{Ca@Fe}_3\text{O}_4$ , b)  $\text{Mg@Fe}_3\text{O}_4$ , c)  $\text{Fe}_3\text{O}_4$ . TEM images of d)  $\text{Ca@Fe}_3\text{O}_4$ , e)  $\text{Mg@Fe}_3\text{O}_4$ , f)  $\text{Fe}_3\text{O}_4$ . TEM-EDS mapping of g)  $\text{Ca@Fe}_3\text{O}_4$ , h)  $\text{Mg@Fe}_3\text{O}_4$ , i)  $\text{Fe}_3\text{O}_4$ .

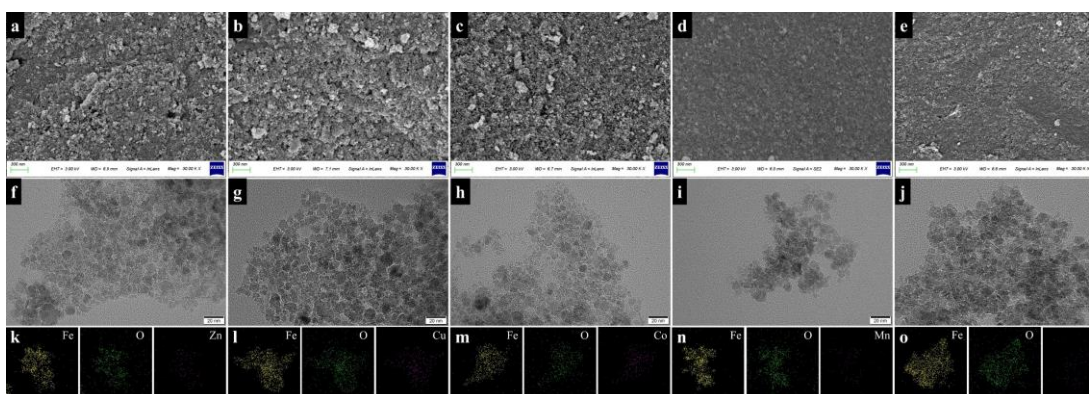

**Fig. S2** SEM images of a)  $\text{Zn@Fe}_3\text{O}_4$ , b)  $\text{Cu@Fe}_3\text{O}_4$ , c)  $\text{Co@Fe}_3\text{O}_4$ , d)  $\text{Mn@Fe}_3\text{O}_4$ , e)  $\text{Cr@Fe}_3\text{O}_4$ . TEM images of f)  $\text{Zn@Fe}_3\text{O}_4$ , g)  $\text{Cu@Fe}_3\text{O}_4$ , h)  $\text{Co@Fe}_3\text{O}_4$ , i)  $\text{Mn@Fe}_3\text{O}_4$ , j)  $\text{Cr@Fe}_3\text{O}_4$ . TEM-EDS mapping of k)  $\text{Zn@Fe}_3\text{O}_4$ , l)  $\text{Cu@Fe}_3\text{O}_4$ , m)  $\text{Co@Fe}_3\text{O}_4$ , n)  $\text{Mn@Fe}_3\text{O}_4$ , o)  $\text{Cr@Fe}_3\text{O}_4$ .

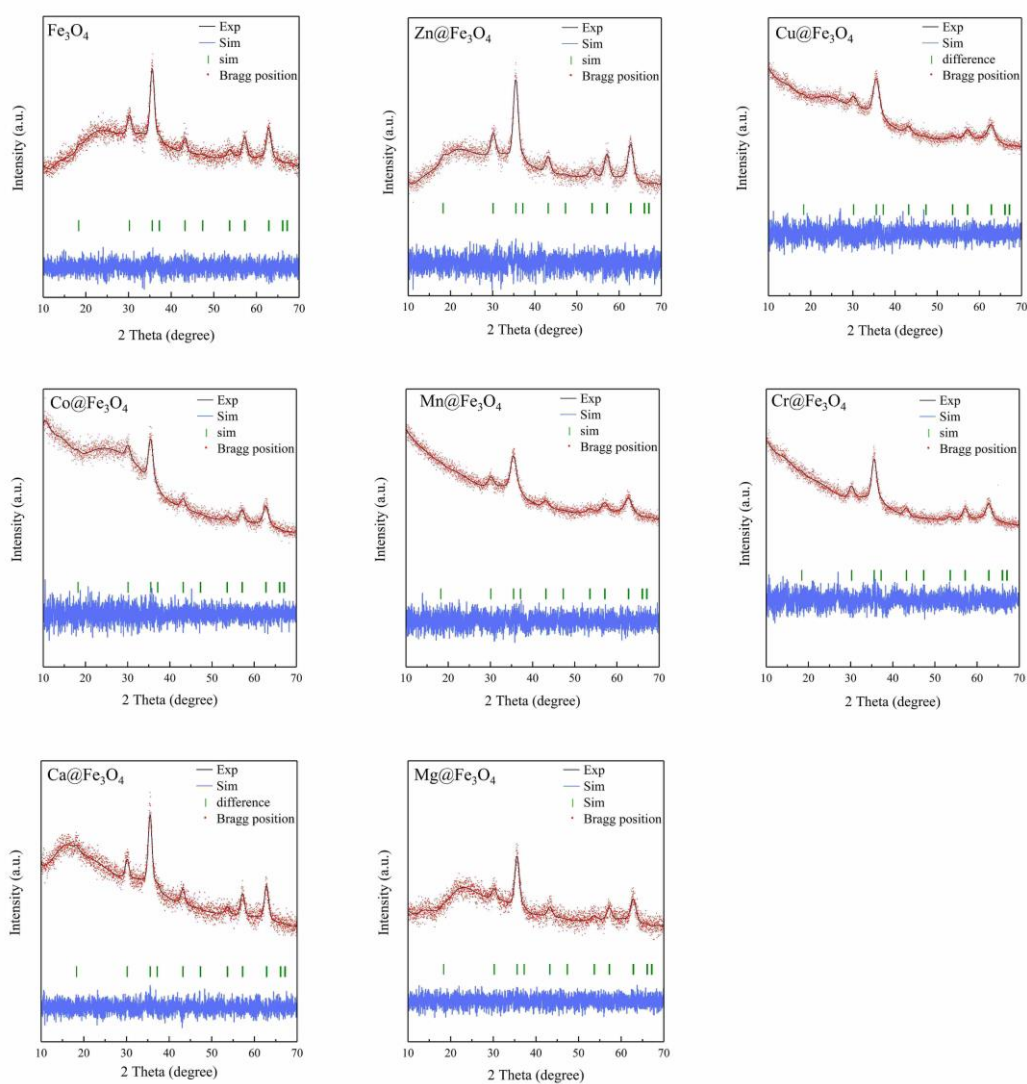

**Fig. S3** Rietveld structural refinements for pristine and metal doped  $\text{Fe}_3\text{O}_4$  materials.

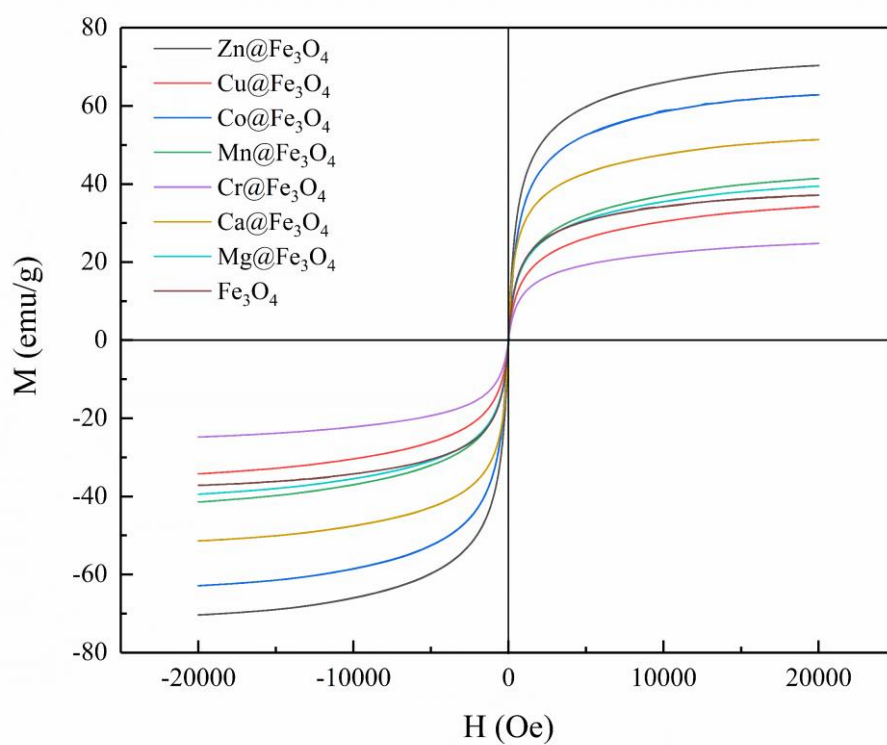

**Fig. S4** The magnetic hysteresis loops of  $\text{Fe}_3\text{O}_4$  and  $\text{M}@\text{Fe}_3\text{O}_4$  powders.

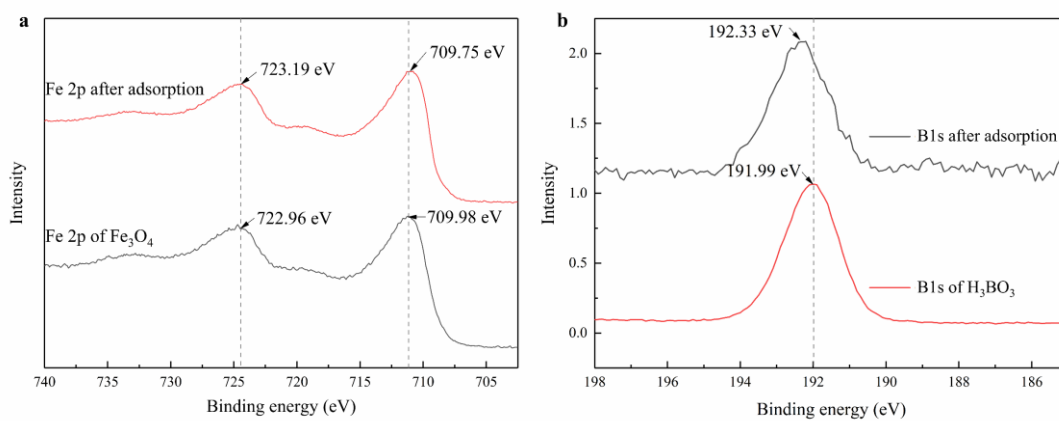

**Fig. S5** XPS spectra of (a) Fe 2p before and after adsorption, (b) B 1s of  $\text{H}_3\text{BO}_3$  and after adsorption.

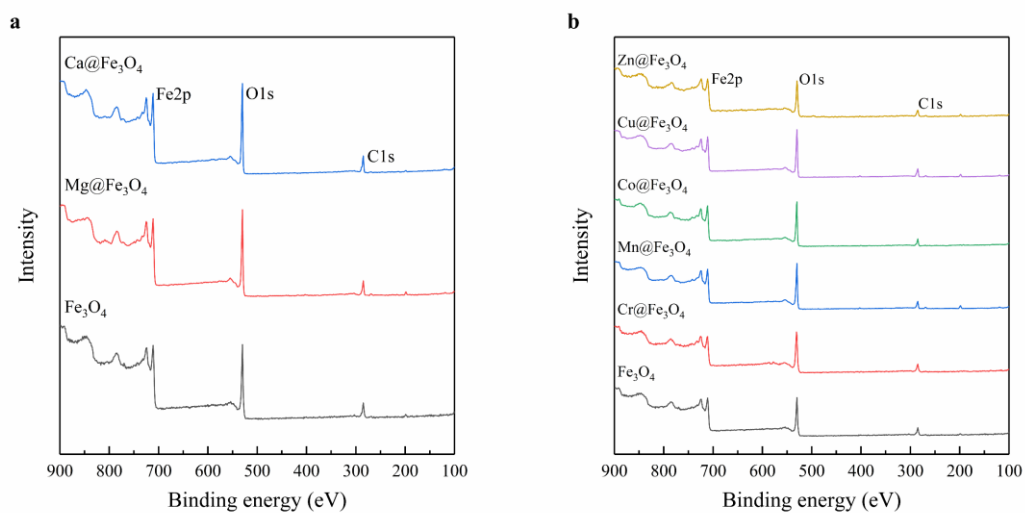

**Fig. S6** (a) Comparison between XPS survey spectra for alkaline-earth metals doped  $\text{Fe}_3\text{O}_4$  nanoparticles. (b) Comparison between XPS survey spectra for transition metals doped  $\text{Fe}_3\text{O}_4$  nanoparticles.

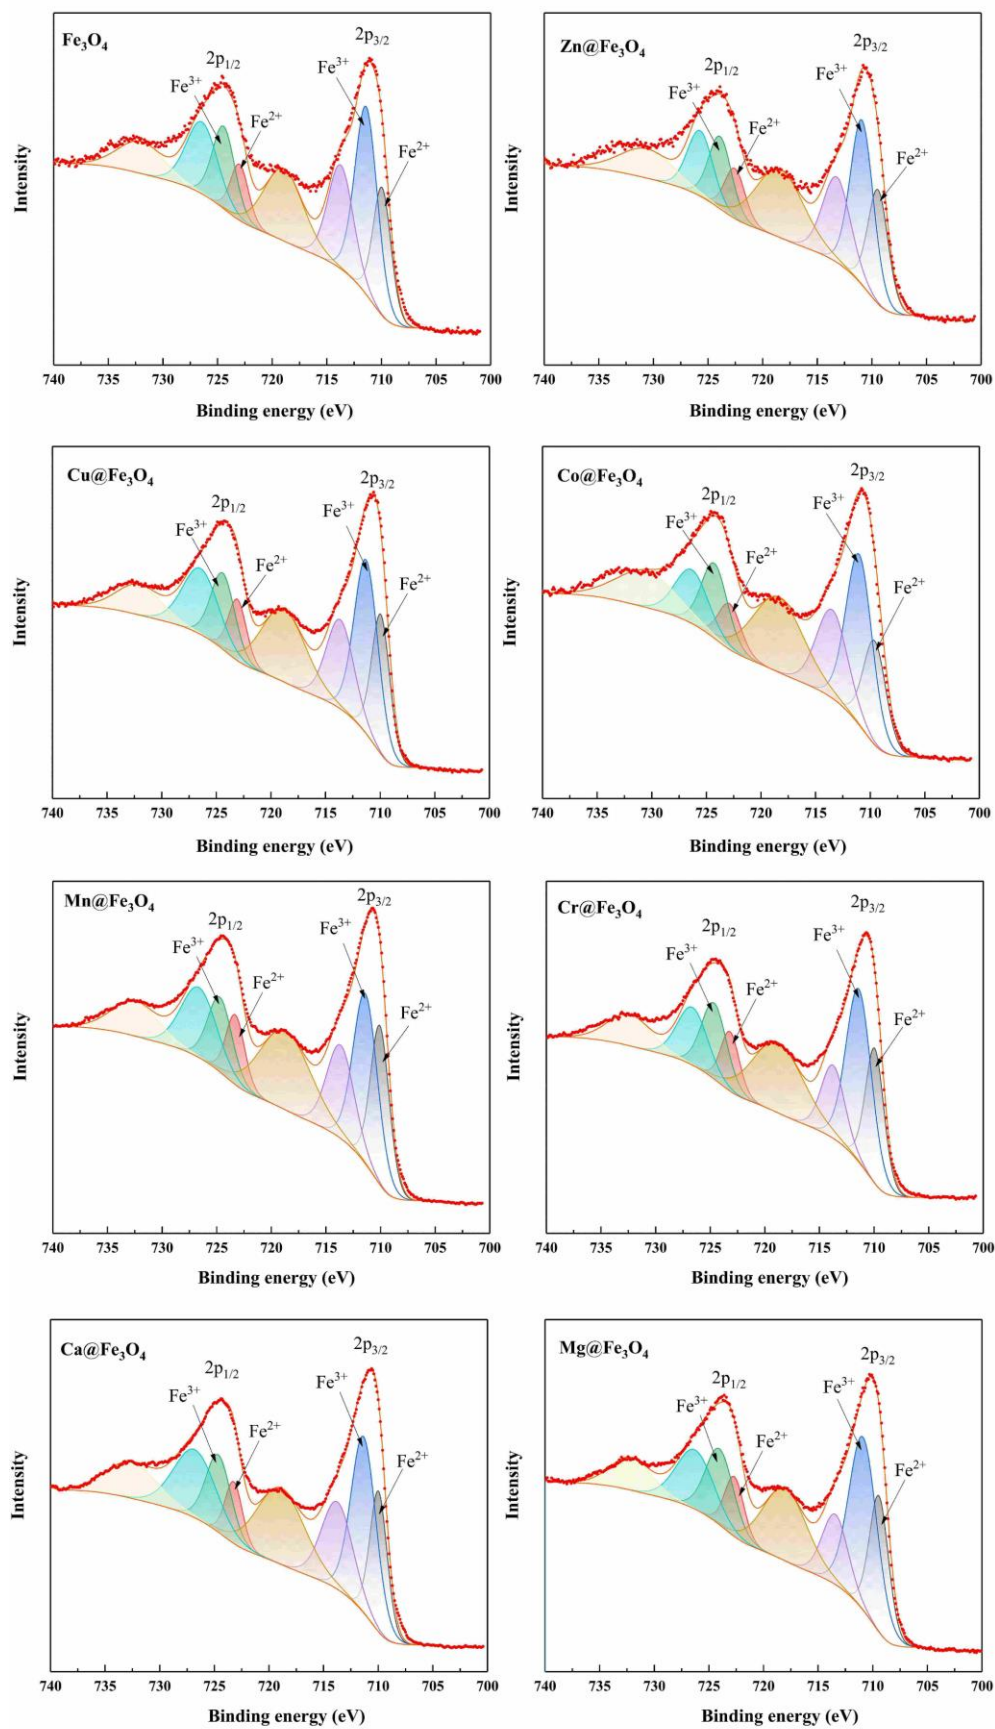

**Fig. S7** XPS spectra of Fe 2p for Fe<sub>3</sub>O<sub>4</sub> and M@Fe<sub>3</sub>O<sub>4</sub> powders.

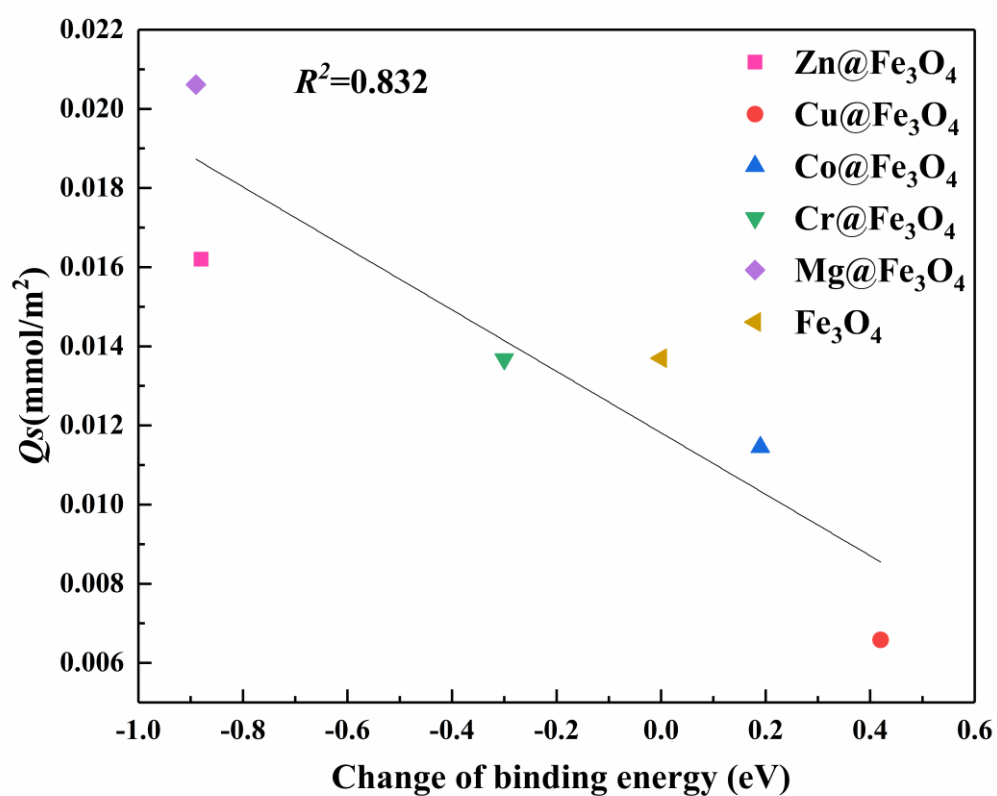

**Fig. S8** The relationship between the shift in oxygen electron density in Fe-O-H of metals doped samples compared to pure  $\text{Fe}_3\text{O}_4$  and boron adsorption capacity per unit area.

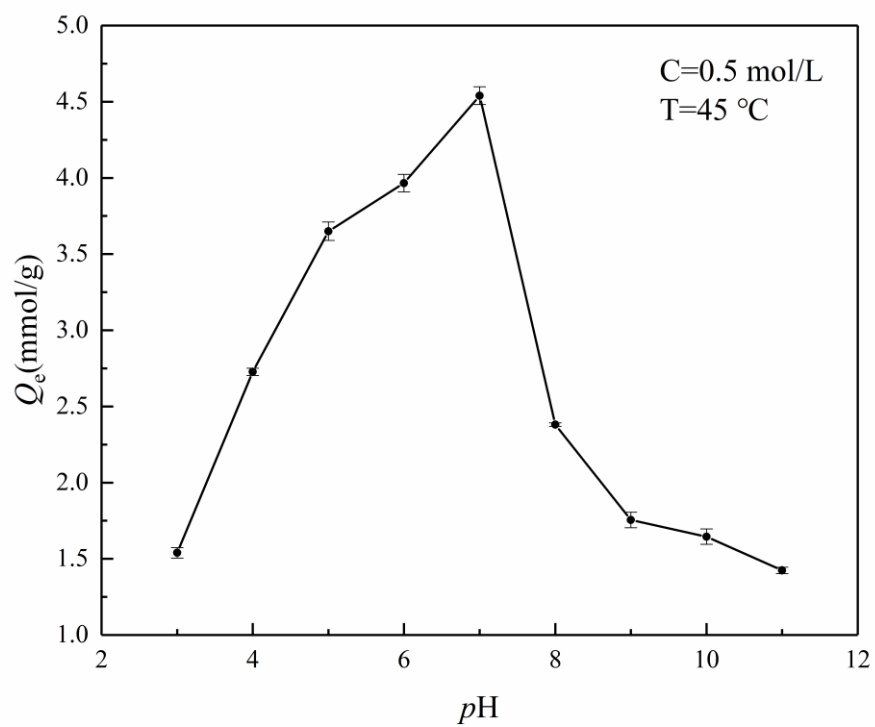

**Fig. S9** Boron adsorption capacity on Mg@Fe<sub>3</sub>O<sub>4</sub> at different pHs.

### 3. Tables

**Table S1** Ionic radius, electronegativity and electrode potential ( $M^{2+}/M$ ) of doped metal and  $Fe^2$

| Metal | Ionic radius (pm) | Electronegativity<br>(Pauling scale) | electrode<br>potential (V) |
|-------|-------------------|--------------------------------------|----------------------------|
| Fe    | 76                | 1.83                                 | -0.44                      |
| Zn    | 74                | 1.65                                 | -0.76                      |
| Cu    | 72                | 1.90                                 | 0.34                       |
| Co    | 74                | 1.88                                 | -0.28                      |
| Mn    | 80                | 1.55                                 | -1.17                      |
| Cr    | 84                | 1.66                                 | 0.90                       |
| Ca    | 99                | 1.00                                 | -2.84                      |
| Mg    | 65                | 1.31                                 | -2.36                      |

**Table S2** FWHM and crystallite sizes of metal doped  $Fe_3O_4$  nanoparticles

| Samples      | Actual doping<br>percentage (%) | FWHM          | Observed<br>crystallite size<br>(nm) | Calculated<br>crystallite size<br>(nm) |
|--------------|---------------------------------|---------------|--------------------------------------|----------------------------------------|
| $Fe_3O_4$    | —                               | $1.234^\circ$ | 7.0                                  | 6.7                                    |
| $Zn@Fe_3O_4$ | 3.8                             | $1.211^\circ$ | 8.0                                  | 6.9                                    |
| $Cu@Fe_3O_4$ | 2.9                             | $1.337^\circ$ | 7.5                                  | 6.3                                    |
| $Co@Fe_3O_4$ | 3.2                             | $1.261^\circ$ | 7.5                                  | 6.6                                    |
| $Mn@Fe_3O_4$ | 2.7                             | $1.175^\circ$ | 8.0                                  | 7.1                                    |
| $Cr@Fe_3O_4$ | 3.0                             | $1.140^\circ$ | 8.0                                  | 7.3                                    |
| $Ca@Fe_3O_4$ | 2.2                             | $0.801^\circ$ | 11.0                                 | 10.5                                   |
| $Mg@Fe_3O_4$ | 3.3                             | $1.301^\circ$ | 6.0                                  | 6.3                                    |

**Table S3** Crystal structural parameters obtained by the Rietveld refinement

| Samples      | $a=b=c$ (Å) | $R_{wp}\%$ | $R_p\%$ | Space group |
|--------------|-------------|------------|---------|-------------|
| $Fe_3O_4$    | 8.354       | 2.03       | 1.62    | Fd-3m       |
| $Zn@Fe_3O_4$ | 8.365       | 1.96       | 1.55    | Fd-3m       |
| $Cu@Fe_3O_4$ | 8.365       | 4.14       | 3.28    | Fd-3m       |
| $Co@Fe_3O_4$ | 8.357       | 4.16       | 3.26    | Fd-3m       |
| $Mn@Fe_3O_4$ | 8.364       | 4.18       | 3.29    | Fd-3m       |
| $Cr@Fe_3O_4$ | 8.363       | 4.74       | 3.75    | Fd-3m       |
| $Ca@Fe_3O_4$ | 8.369       | 2.16       | 1.72    | Fd-3m       |
| $Mg@Fe_3O_4$ | 8.350       | 2.12       | 1.69    | Fd-3m       |

**Table S4** Magnetic and resistive parameters obtained for pure and doped Fe<sub>3</sub>O<sub>4</sub> samples

| Samples                           | Hc (G) | Mr (emu/g) | Ms (emu/g) |
|-----------------------------------|--------|------------|------------|
| Fe <sub>3</sub> O <sub>4</sub>    | 0.4    | 0.03       | 37.11      |
| Zn@Fe <sub>3</sub> O <sub>4</sub> | 6.0    | 0.44       | 70.33      |
| Cu@Fe <sub>3</sub> O <sub>4</sub> | 0.65   | 0.03       | 34.18      |
| Co@Fe <sub>3</sub> O <sub>4</sub> | 22.8   | 1.52       | 62.79      |
| Mn@Fe <sub>3</sub> O <sub>4</sub> | 12.7   | 0.55       | 41.41      |
| Cr@Fe <sub>3</sub> O <sub>4</sub> | 0.6    | 0.02       | 24.76      |
| Ca@Fe <sub>3</sub> O <sub>4</sub> | 3.2    | 0.33       | 51.32      |
| Mg@Fe <sub>3</sub> O <sub>4</sub> | 0.5    | 0.03       | 39.42      |

**Table S5** Fe2p binding energy in metal doped Fe<sub>3</sub>O<sub>4</sub> nanoparticles

| Samples                           | Fe <sup>2+</sup> 2p <sub>3/2</sub> | Fe <sup>3+</sup> 2p <sub>3/2</sub> | Fe <sup>2+</sup> 2p <sub>1/2</sub> | Fe <sup>3+</sup> 2p <sub>1/2</sub> | Fe <sup>3+</sup> / Fe <sup>2+</sup> |
|-----------------------------------|------------------------------------|------------------------------------|------------------------------------|------------------------------------|-------------------------------------|
| Fe <sub>3</sub> O <sub>4</sub>    | 709.94                             | 711.40                             | 723.17                             | 724.44                             | 1.8                                 |
| Zn@Fe <sub>3</sub> O <sub>4</sub> | 709.89                             | 711.61                             | 723.15                             | 724.60                             | 1.8                                 |
| Cu@Fe <sub>3</sub> O <sub>4</sub> | 709.95                             | 711.41                             | 723.27                             | 724.62                             | 1.8                                 |
| Co@Fe <sub>3</sub> O <sub>4</sub> | 709.91                             | 711.33                             | 723.16                             | 724.55                             | 1.8                                 |
| Mn@Fe <sub>3</sub> O <sub>4</sub> | 709.90                             | 711.36                             | 723.25                             | 724.68                             | 1.8                                 |
| Cr@Fe <sub>3</sub> O <sub>4</sub> | 709.93                             | 711.38                             | 723.19                             | 724.65                             | 1.8                                 |
| Ca@Fe <sub>3</sub> O <sub>4</sub> | 709.97                             | 711.34                             | 723.18                             | 724.64                             | 1.8                                 |
| Mg@Fe <sub>3</sub> O <sub>4</sub> | 709.82                             | 711.32                             | 722.77                             | 724.02                             | 1.8                                 |

**Table S6** Fe-O-Fe and Fe-O-H binding energy in metal doped Fe<sub>3</sub>O<sub>4</sub> nanoparticles

| Samples                           | Oxygen in Fe-O-Fe (eV) | Shift(eV) | Oxygen in Fe-O-H (eV) | Shift(eV) |
|-----------------------------------|------------------------|-----------|-----------------------|-----------|
| Fe <sub>3</sub> O <sub>4</sub>    | 530.12                 | 0         | 531.68                | 0         |
| Zn@Fe <sub>3</sub> O <sub>4</sub> | 529.91                 | -0.21     | 530.80                | -0.88     |
| Cu@Fe <sub>3</sub> O <sub>4</sub> | 531.00                 | 0.88      | 532.10                | 0.42      |
| Co@Fe <sub>3</sub> O <sub>4</sub> | 530.47                 | 0.35      | 531.87                | 0.19      |
| Mn@Fe <sub>3</sub> O <sub>4</sub> | 529.82                 | -0.3      | 531.13                | -0.55     |
| Cr@Fe <sub>3</sub> O <sub>4</sub> | 530.06                 | -0.06     | 531.38                | -0.3      |
| Ca@Fe <sub>3</sub> O <sub>4</sub> | 529.26                 | -0.86     | 530.72                | -0.96     |
| Mg@Fe <sub>3</sub> O <sub>4</sub> | 529.92                 | -0.2      | 530.79                | -0.89     |

**Table S7** Boron adsorption capacity for pure and doped Fe<sub>3</sub>O<sub>4</sub> samples

| Samples                           | $Q_e$<br>(mmol/g) | Specific surface<br>area $A$ (m <sup>2</sup> /g) | $Q_s$<br>(mmol/m <sup>2</sup> ) |
|-----------------------------------|-------------------|--------------------------------------------------|---------------------------------|
| Fe <sub>3</sub> O <sub>4</sub>    | 2.36              | 173                                              | 0.0137                          |
| Zn@Fe <sub>3</sub> O <sub>4</sub> | 2.72              | 168                                              | 0.0162                          |
| Cu@Fe <sub>3</sub> O <sub>4</sub> | 1.21              | 184                                              | 0.0066                          |
| Co@Fe <sub>3</sub> O <sub>4</sub> | 2.01              | 176                                              | 0.0115                          |
| Mn@Fe <sub>3</sub> O <sub>4</sub> | 1.85              | 163                                              | 0.0113                          |
| Cr@Fe <sub>3</sub> O <sub>4</sub> | 2.17              | 159                                              | 0.0137                          |
| Ca@Fe <sub>3</sub> O <sub>4</sub> | 1.29              | 110                                              | 0.0117                          |
| Mg@Fe <sub>3</sub> O <sub>4</sub> | 3.79              | 184                                              | 0.0206                          |

Note: 1. Specific surface area  $A$  was evaluated by calculated crystallite sizes of nonporous spherical particle.

$$2. Q_s = Q_e / A$$

**References:**

1. T. Chen, Q. Wang, J. Lyu, P. Bai and X. Guo, *Separation and Purification Technology*, 2020, **231**, 1-10.
2. J. Speight, in *Lange's Handbook of Chemistry*, McGraw Hill LLC, McGraw Hill, September 2016, pp. 618-701.
